# Supplementary figures and images for: A Methodological Framework to Discover Pharmacogenomic Interactions Based on Random Forests
Source: MDPI journal article supplement (doi:10.3390/genes12060933), 2021-06-18

## Data sources and data reduction

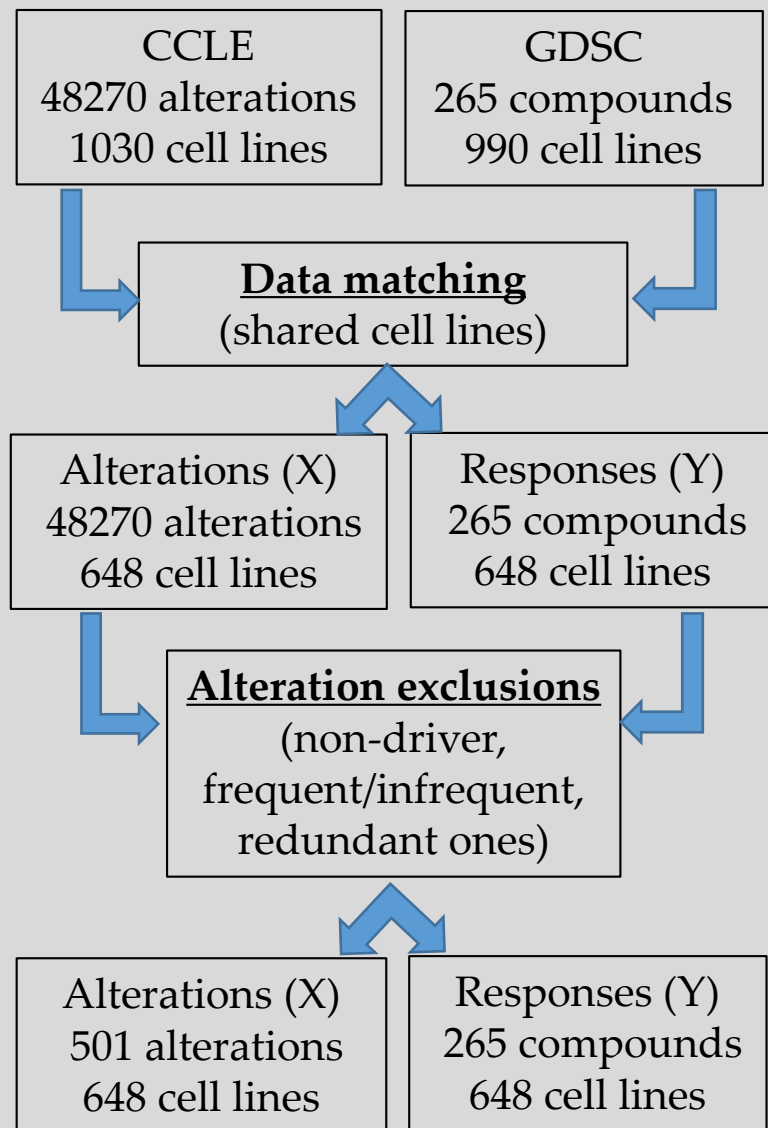

## Data analysis (for each compound)

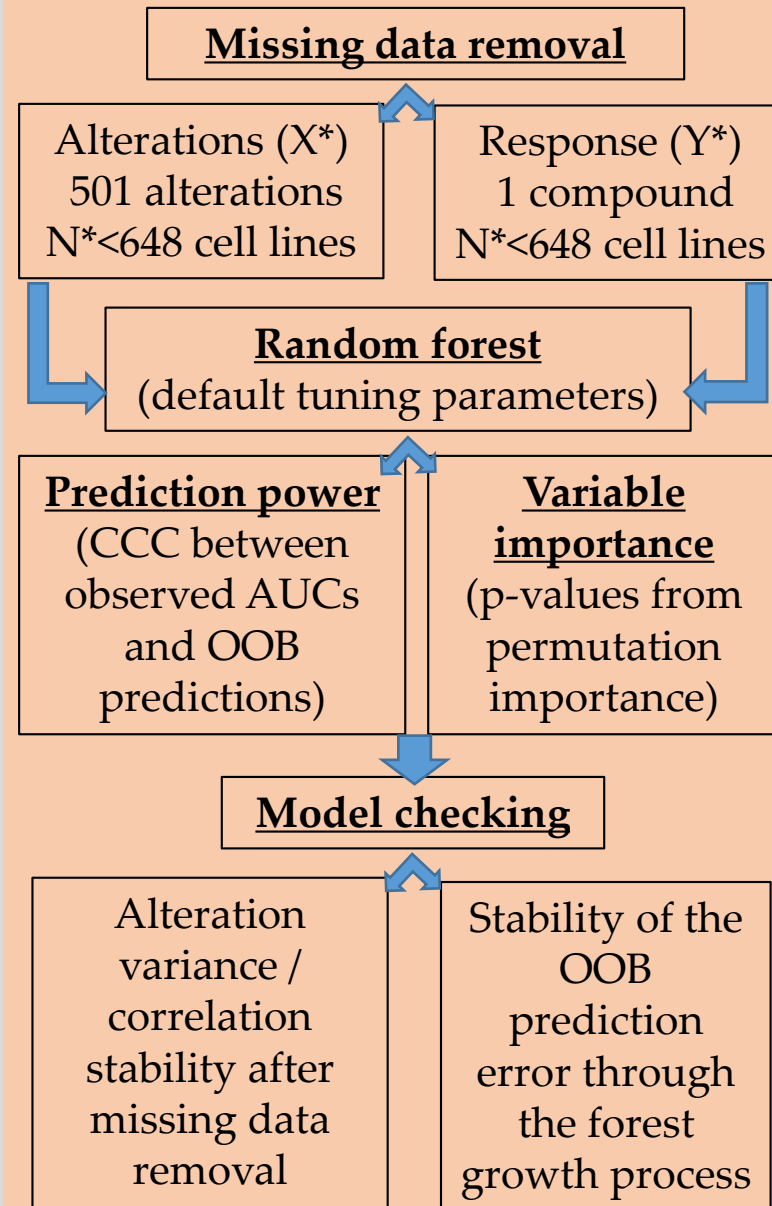

## Reporting results

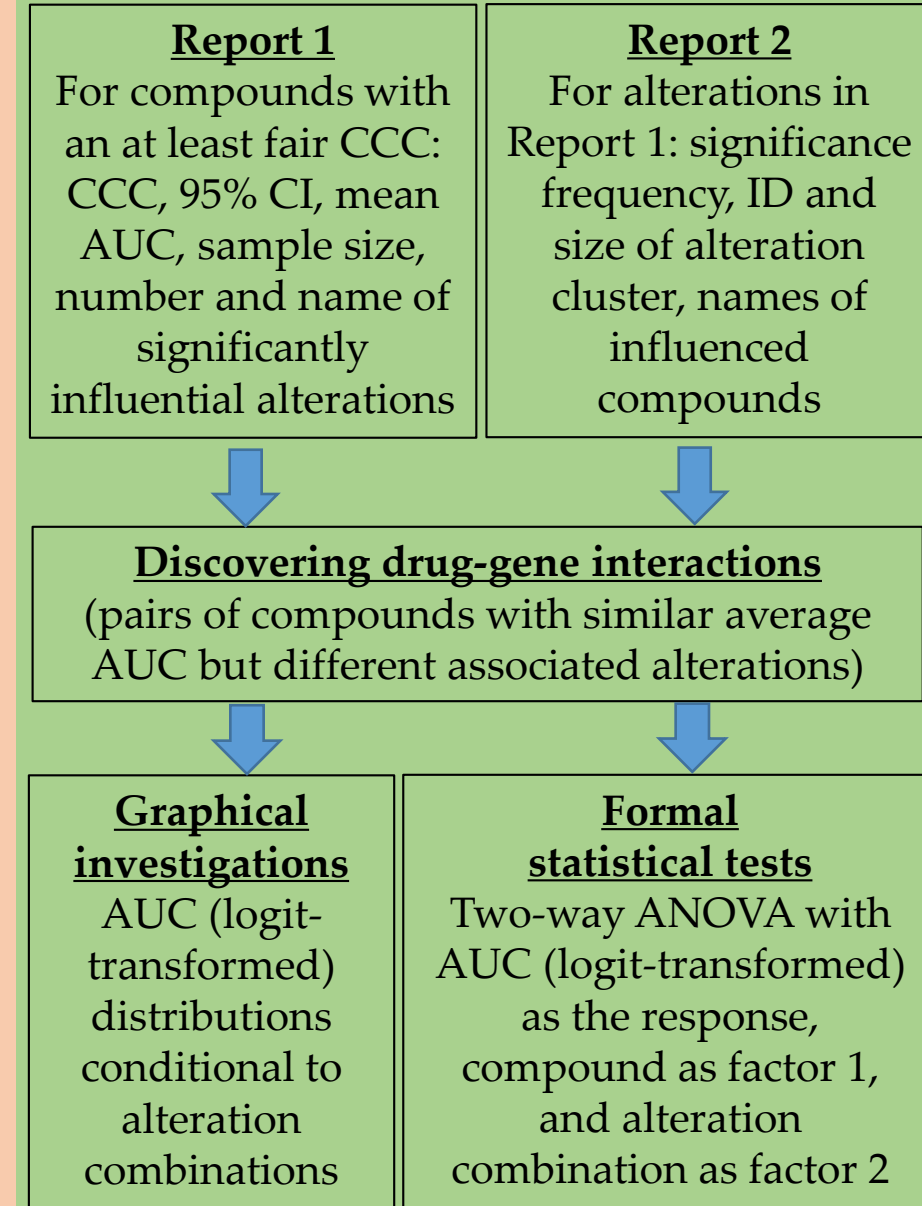

Supplement: s1 [file s1]
